# Supplementary material for: Economic Burden of Colorectal Cancer in Korea
Source: PubMed Central journal article supplement — J Prev Med Public Health. 2014 Mar 31;47(2):84–93. doi: 10.3961/jpmph.2014.47.2.84 (PMC3988286; doi:10.3961/jpmph.2014.47.2.84), 2014-03-31
Supplement: jpmph-47-84-s002.pdf [file jpmph-47-84-s002.pdf]

**Supplemental Table 2.** Colorectal cancer is considered to have few comorbidities in patients who are taking certain pharmaceuticals for diabetes, hypertension, hyperlipidemia, and depression

| Depression    | Hypertension        |               | Diabetes       | Hyperlipidemia     | Etc.            |
|---------------|---------------------|---------------|----------------|--------------------|-----------------|
| Amitriptyline | Alacepril           | Imidapril     | Acarbose       | Cholestyramine     | Dichloroacetate |
| Amoxapine     | Amiloridee          | Indapamide    | Chlorpropamide | Ezetimibe          | Fibrate         |
| Bupropion     | Amineptine          | Indapamide    | Chlorpropamide | Fibrate            | Somatostatin    |
| Citalopram    | Amlodipine          | Irbesartan    | Glibenclamide  | Lipitor            |                 |
| Clomipramine  | Arotinolol          | Isradipine    | Gliclazide     | Nicotinic acid     |                 |
| Dothiepin     | Atenolol            | Labetalol     | Glimepiride    | Omega-3 fatty acid |                 |
| Escitalopram  | Barnidipine         | Lacidipine    | Glimepiride    | Ramipril           |                 |
| Fluoxetine    | Benazepril          | Lercanidipine | Glipizide      |                    |                 |
| Fluvoxamine   | Benidipine          | Lisinopril    | Glipizide      |                    |                 |
| Imipramine    | Betaxolol           | Losartan      | Gliquidone     |                    |                 |
| Maprotiline   | Bevantolol          | Manidipine    | Insulin Lispro |                    |                 |
| Medifoxamine  | Bisoprolol          | Metoprolol    | Miglitol       |                    |                 |
| Mianserine    | BunazosinW          | Moexipril     | Nateglinide    |                    |                 |
| Milnacipran   | Candesartan         | Nadolol       | Pioglitazone   |                    |                 |
| Mirtazapine   | Captopril           | Nicardipine   | Repaglinide    |                    |                 |
| Moclobemide   | Carteolol           | Nifedipine    | Rosiglitazone  |                    |                 |
| Nefazodone    | Carvedilol          | Perindopril   | Voglibose      |                    |                 |
| Paroxetine    | Celiprolol          | Prazosin      |                |                    |                 |
| Quinupramine  | Chlorthalidon       | Propranolol   |                |                    |                 |
| Sertraline    | Cilazapril          | Quinapril     |                |                    |                 |
| Tianeptine    | Cilnidipine         | Rosiglitazone |                |                    |                 |
| Toloxatone    | Delapril            | Spirolactone  |                |                    |                 |
| Venlafaxine   | Diltiazem           | Telmisartan   |                |                    |                 |
|               | Doxazosin           | Temicapril    |                |                    |                 |
|               | Doxepin             | Terazosin     |                |                    |                 |
|               | Efonidipine         | Torasemide    |                |                    |                 |
|               | Enalapril           | Trazodone     |                |                    |                 |
|               | Eprosartan          | Tripamide     |                |                    |                 |
|               | Felodipine          | Valsartan     |                |                    |                 |
|               | Fosinopril          | Verapamil     |                |                    |                 |
|               | Hydrochlorothiazide |               |                |                    |                 |
